# Supplementary material for: Alkali metal complexes of a naphthylamine-substituted phosphanide
Source: Royal Society of Chemistry journal article supplement (doi:10.1039/b715145d), 2007-12-07
Supplement: b715145d-1.mdl [file b715145d-1.mdl]

NaphthylLiA_MP2

Created by GaussView 3.09
 71 73  0  0  0  0  0  0  0  0  0    0
   -0.9271   -0.3015    1.8722 P   0  0  0  0  0  0  0  0  0  0  0  0
    0.9287   -0.3036   -1.8743 P   0  0  0  0  0  0  0  0  0  0  0  0
   -1.9966   -2.2400   -0.2679 N   0  0  0  0  0  0  0  0  0  0  0  0
    1.9964   -2.2410    0.2670 N   0  0  0  0  0  0  0  0  0  0  0  0
   -0.0001   -1.5100   -0.0007 Li  0  0  0  0  0  0  0  0  0  0  0  0
   -0.4754    0.7430    3.3623 C   0  0  0  0  0  0  0  0  0  0  0  0
   -0.5767    1.8232    3.2035 H   0  0  0  0  0  0  0  0  0  0  0  0
   -2.6078    0.2664    1.4157 C   0  0  0  0  0  0  0  0  0  0  0  0
   -3.2557    1.2000    2.2398 C   0  0  0  0  0  0  0  0  0  0  0  0
   -2.8156    1.4475    3.1983 H   0  0  0  0  0  0  0  0  0  0  0  0
   -4.4333    1.8698    1.8704 C   0  0  0  0  0  0  0  0  0  0  0  0
   -4.8795    2.5841    2.5580 H   0  0  0  0  0  0  0  0  0  0  0  0
   -4.9857    1.6545    0.6309 C   0  0  0  0  0  0  0  0  0  0  0  0
   -5.8584    2.2077    0.2964 H   0  0  0  0  0  0  0  0  0  0  0  0
   -4.4268    0.6778   -0.2338 C   0  0  0  0  0  0  0  0  0  0  0  0
   -5.0142    0.4999   -1.5159 C   0  0  0  0  0  0  0  0  0  0  0  0
   -5.8461    1.1411   -1.7942 H   0  0  0  0  0  0  0  0  0  0  0  0
   -4.5403   -0.4512   -2.3777 C   0  0  0  0  0  0  0  0  0  0  0  0
   -4.9749   -0.5784   -3.3649 H   0  0  0  0  0  0  0  0  0  0  0  0
   -3.5191   -1.3239   -1.9519 C   0  0  0  0  0  0  0  0  0  0  0  0
   -3.2374   -2.1289   -2.6162 H   0  0  0  0  0  0  0  0  0  0  0  0
   -2.9210   -1.2046   -0.7059 C   0  0  0  0  0  0  0  0  0  0  0  0
   -3.2862   -0.1119    0.1753 C   0  0  0  0  0  0  0  0  0  0  0  0
   -1.5857   -3.1940   -1.3147 C   0  0  0  0  0  0  0  0  0  0  0  0
   -2.4203   -3.8061   -1.6891 H   0  0  0  0  0  0  0  0  0  0  0  0
   -0.8521   -3.8810   -0.8800 H   0  0  0  0  0  0  0  0  0  0  0  0
   -1.1122   -2.6691   -2.1470 H   0  0  0  0  0  0  0  0  0  0  0  0
   -2.5740   -3.0142    0.8595 C   0  0  0  0  0  0  0  0  0  0  0  0
   -3.4431   -3.5975    0.5197 H   0  0  0  0  0  0  0  0  0  0  0  0
   -2.8711   -2.3467    1.6641 H   0  0  0  0  0  0  0  0  0  0  0  0
   -1.8158   -3.6982    1.2509 H   0  0  0  0  0  0  0  0  0  0  0  0
    0.4769    0.7427   -3.3631 C   0  0  0  0  0  0  0  0  0  0  0  0
   -0.5761    0.5304   -3.5747 H   0  0  0  0  0  0  0  0  0  0  0  0
    2.6083    0.2660   -1.4154 C   0  0  0  0  0  0  0  0  0  0  0  0
    3.2560    1.2007   -2.2384 C   0  0  0  0  0  0  0  0  0  0  0  0
    2.8166    1.4484   -3.1972 H   0  0  0  0  0  0  0  0  0  0  0  0
    4.4327    1.8712   -1.8675 C   0  0  0  0  0  0  0  0  0  0  0  0
    4.8789    2.5863   -2.5543 H   0  0  0  0  0  0  0  0  0  0  0  0
    4.9845    1.6555   -0.6278 C   0  0  0  0  0  0  0  0  0  0  0  0
    5.8565    2.2090   -0.2923 H   0  0  0  0  0  0  0  0  0  0  0  0
    4.4256    0.6777    0.2357 C   0  0  0  0  0  0  0  0  0  0  0  0
    5.0124    0.4994    1.5182 C   0  0  0  0  0  0  0  0  0  0  0  0
    5.8437    1.1409    1.7973 H   0  0  0  0  0  0  0  0  0  0  0  0
    4.5385   -0.4525    2.3791 C   0  0  0  0  0  0  0  0  0  0  0  0
    4.9725   -0.5801    3.3664 H   0  0  0  0  0  0  0  0  0  0  0  0
    3.5179   -1.3254    1.9522 C   0  0  0  0  0  0  0  0  0  0  0  0
    3.2361   -2.1309    2.6158 H   0  0  0  0  0  0  0  0  0  0  0  0
    2.9205   -1.2057    0.7058 C   0  0  0  0  0  0  0  0  0  0  0  0
    3.2859   -0.1124   -0.1746 C   0  0  0  0  0  0  0  0  0  0  0  0
    2.5746   -3.0152   -0.8600 C   0  0  0  0  0  0  0  0  0  0  0  0
    3.4433   -3.5987   -0.5195 H   0  0  0  0  0  0  0  0  0  0  0  0
    2.8726   -2.3476   -1.6642 H   0  0  0  0  0  0  0  0  0  0  0  0
    1.8166   -3.6989   -1.2522 H   0  0  0  0  0  0  0  0  0  0  0  0
    1.5845   -3.1951    1.3133 C   0  0  0  0  0  0  0  0  0  0  0  0
    2.4186   -3.8074    1.6883 H   0  0  0  0  0  0  0  0  0  0  0  0
    0.8510   -3.8818    0.8780 H   0  0  0  0  0  0  0  0  0  0  0  0
    1.1105   -2.6701    2.1454 H   0  0  0  0  0  0  0  0  0  0  0  0
    0.0020    3.0711   -0.0007 O   0  0  0  0  0  0  0  0  0  0  0  0
    1.0206    3.8599   -0.6181 C   0  0  0  0  0  0  0  0  0  0  0  0
    1.5132    4.4981    0.1265 H   0  0  0  0  0  0  0  0  0  0  0  0
    0.5906    4.4905   -1.4067 H   0  0  0  0  0  0  0  0  0  0  0  0
    0.0032    1.1599   -0.0008 Li  0  0  0  0  0  0  0  0  0  0  0  0
    1.7497    3.1742   -1.0522 H   0  0  0  0  0  0  0  0  0  0  0  0
    0.5772    1.8227   -3.2028 H   0  0  0  0  0  0  0  0  0  0  0  0
    1.0507    0.4767   -4.2578 H   0  0  0  0  0  0  0  0  0  0  0  0
    0.5778    0.5313    3.5732 H   0  0  0  0  0  0  0  0  0  0  0  0
   -1.0486    0.4753    4.2569 H   0  0  0  0  0  0  0  0  0  0  0  0
   -1.0203    3.8563    0.6152 C   0  0  0  0  0  0  0  0  0  0  0  0
   -1.5158    4.4909   -0.1306 H   0  0  0  0  0  0  0  0  0  0  0  0
   -1.7463    3.1681    1.0505 H   0  0  0  0  0  0  0  0  0  0  0  0
   -0.5933    4.4904    1.4027 H   0  0  0  0  0  0  0  0  0  0  0  0
  1  5  1  0  0  0  0
  1  6  1  0  0  0  0
  1  8  1  0  0  0  0
  2  5  1  0  0  0  0
  2 32  1  0  0  0  0
  2 34  1  0  0  0  0
  3 22  1  0  0  0  0
  3 24  1  0  0  0  0
  3 28  1  0  0  0  0
  4 48  1  0  0  0  0
  4 50  1  0  0  0  0
  4 54  1  0  0  0  0
  6  7  1  0  0  0  0
  6 66  1  0  0  0  0
  6 67  1  0  0  0  0
  8  9  4  0  0  0  0
  8 23  1  0  0  0  0
  9 10  1  0  0  0  0
  9 11  4  0  0  0  0
 11 12  1  0  0  0  0
 11 13  2  0  0  0  0
 13 14  1  0  0  0  0
 13 15  4  0  0  0  0
 15 16  4  0  0  0  0
 15 23  4  0  0  0  0
 16 17  1  0  0  0  0
 16 18  2  0  0  0  0
 18 19  1  0  0  0  0
 18 20  4  0  0  0  0
 20 21  1  0  0  0  0
 20 22  4  0  0  0  0
 22 23  1  0  0  0  0
 24 25  1  0  0  0  0
 24 26  1  0  0  0  0
 24 27  1  0  0  0  0
 28 29  1  0  0  0  0
 28 30  1  0  0  0  0
 28 31  1  0  0  0  0
 32 33  1  0  0  0  0
 32 64  1  0  0  0  0
 32 65  1  0  0  0  0
 34 35  4  0  0  0  0
 34 49  1  0  0  0  0
 35 36  1  0  0  0  0
 35 37  4  0  0  0  0
 37 38  1  0  0  0  0
 37 39  2  0  0  0  0
 39 40  1  0  0  0  0
 39 41  4  0  0  0  0
 41 42  4  0  0  0  0
 41 49  4  0  0  0  0
 42 43  1  0  0  0  0
 42 44  2  0  0  0  0
 44 45  1  0  0  0  0
 44 46  4  0  0  0  0
 46 47  1  0  0  0  0
 46 48  4  0  0  0  0
 48 49  1  0  0  0  0
 50 51  1  0  0  0  0
 50 52  1  0  0  0  0
 50 53  1  0  0  0  0
 54 55  1  0  0  0  0
 54 56  1  0  0  0  0
 54 57  1  0  0  0  0
 58 59  1  0  0  0  0
 58 62  1  0  0  0  0
 58 68  1  0  0  0  0
 59 60  1  0  0  0  0
 59 61  1  0  0  0  0
 59 63  1  0  0  0  0
 68 69  1  0  0  0  0
 68 70  1  0  0  0  0
 68 71  1  0  0  0  0
