# Supplementary material for: Alkali metal complexes of a naphthylamine-substituted phosphanide
Source: Royal Society of Chemistry journal article supplement (doi:10.1039/b715145d), 2007-12-07
Supplement: b715145d-2.mdl [file b715145d-2.mdl]

NaphthylLicis_MP2

Created by GaussView 3.09
 71 73  0  0  0  0  0  0  0  0  0    0
    1.3164   -0.9084    0.7229 P   0  0  0  0  0  0  0  0  0  0  0  0
   -2.4373   -2.1192    0.6112 P   0  0  0  0  0  0  0  0  0  0  0  0
    4.1466   -1.7956   -0.4538 N   0  0  0  0  0  0  0  0  0  0  0  0
   -1.5394   -0.7642   -2.0493 N   0  0  0  0  0  0  0  0  0  0  0  0
   -0.4651   -1.8253   -0.6227 Li  0  0  0  0  0  0  0  0  0  0  0  0
    2.2705   -1.8585    2.0254 C   0  0  0  0  0  0  0  0  0  0  0  0
    2.7898   -1.1782    2.7079 H   0  0  0  0  0  0  0  0  0  0  0  0
    2.3532    0.5370    0.2142 C   0  0  0  0  0  0  0  0  0  0  0  0
    1.6323    1.7260    0.0645 C   0  0  0  0  0  0  0  0  0  0  0  0
    0.5514    1.6908    0.1832 H   0  0  0  0  0  0  0  0  0  0  0  0
    2.2389    2.9790   -0.1356 C   0  0  0  0  0  0  0  0  0  0  0  0
    1.6201    3.8657   -0.2463 H   0  0  0  0  0  0  0  0  0  0  0  0
    3.6094    3.0815   -0.0840 C   0  0  0  0  0  0  0  0  0  0  0  0
    4.1022    4.0489   -0.1282 H   0  0  0  0  0  0  0  0  0  0  0  0
    4.4083    1.9155    0.0256 C   0  0  0  0  0  0  0  0  0  0  0  0
    5.8215    2.0466    0.1170 C   0  0  0  0  0  0  0  0  0  0  0  0
    6.2485    3.0451    0.1548 H   0  0  0  0  0  0  0  0  0  0  0  0
    6.6223    0.9348    0.1571 C   0  0  0  0  0  0  0  0  0  0  0  0
    7.7011    1.0317    0.2430 H   0  0  0  0  0  0  0  0  0  0  0  0
    6.0519   -0.3448   -0.0064 C   0  0  0  0  0  0  0  0  0  0  0  0
    6.7144   -1.1958   -0.1110 H   0  0  0  0  0  0  0  0  0  0  0  0
    4.6802   -0.5239   -0.1197 C   0  0  0  0  0  0  0  0  0  0  0  0
    3.7915    0.6086    0.0412 C   0  0  0  0  0  0  0  0  0  0  0  0
    4.9820   -2.9577   -0.1989 C   0  0  0  0  0  0  0  0  0  0  0  0
    5.8256   -3.0652   -0.9052 H   0  0  0  0  0  0  0  0  0  0  0  0
    4.3651   -3.8583   -0.2880 H   0  0  0  0  0  0  0  0  0  0  0  0
    5.3851   -2.9171    0.8159 H   0  0  0  0  0  0  0  0  0  0  0  0
    3.5393   -1.8656   -1.7825 C   0  0  0  0  0  0  0  0  0  0  0  0
    2.9160   -2.7636   -1.8501 H   0  0  0  0  0  0  0  0  0  0  0  0
    4.3036   -1.9069   -2.5799 H   0  0  0  0  0  0  0  0  0  0  0  0
    2.9051   -0.9969   -1.9519 H   0  0  0  0  0  0  0  0  0  0  0  0
   -3.2463   -3.2725    1.8384 C   0  0  0  0  0  0  0  0  0  0  0  0
   -2.4532   -3.9264    2.2148 H   0  0  0  0  0  0  0  0  0  0  0  0
   -3.7672   -0.9831    0.0786 C   0  0  0  0  0  0  0  0  0  0  0  0
   -5.0372   -1.1047    0.6580 C   0  0  0  0  0  0  0  0  0  0  0  0
   -5.2561   -1.9721    1.2689 H   0  0  0  0  0  0  0  0  0  0  0  0
   -6.0334   -0.1213    0.5408 C   0  0  0  0  0  0  0  0  0  0  0  0
   -6.9951   -0.2755    1.0236 H   0  0  0  0  0  0  0  0  0  0  0  0
   -5.7680    1.0480   -0.1297 C   0  0  0  0  0  0  0  0  0  0  0  0
   -6.4953    1.8534   -0.1714 H   0  0  0  0  0  0  0  0  0  0  0  0
   -4.5289    1.2139   -0.8019 C   0  0  0  0  0  0  0  0  0  0  0  0
   -4.2786    2.4463   -1.4641 C   0  0  0  0  0  0  0  0  0  0  0  0
   -5.0324    3.2266   -1.4036 H   0  0  0  0  0  0  0  0  0  0  0  0
   -3.1144    2.6454   -2.1556 C   0  0  0  0  0  0  0  0  0  0  0  0
   -2.9091    3.5926   -2.6456 H   0  0  0  0  0  0  0  0  0  0  0  0
   -2.2039    1.5790   -2.2995 C   0  0  0  0  0  0  0  0  0  0  0  0
   -1.3508    1.7316   -2.9459 H   0  0  0  0  0  0  0  0  0  0  0  0
   -2.4097    0.3494   -1.6912 C   0  0  0  0  0  0  0  0  0  0  0  0
   -3.5420    0.1573   -0.8068 C   0  0  0  0  0  0  0  0  0  0  0  0
   -2.2974   -1.7813   -2.8235 C   0  0  0  0  0  0  0  0  0  0  0  0
   -2.6162   -1.3727   -3.7937 H   0  0  0  0  0  0  0  0  0  0  0  0
   -3.1663   -2.1098   -2.2576 H   0  0  0  0  0  0  0  0  0  0  0  0
   -1.6571   -2.6516   -3.0015 H   0  0  0  0  0  0  0  0  0  0  0  0
   -0.3347   -0.3918   -2.8179 C   0  0  0  0  0  0  0  0  0  0  0  0
   -0.5699   -0.0033   -3.8200 H   0  0  0  0  0  0  0  0  0  0  0  0
    0.2804   -1.2879   -2.9526 H   0  0  0  0  0  0  0  0  0  0  0  0
    0.2556    0.3465   -2.2715 H   0  0  0  0  0  0  0  0  0  0  0  0
   -1.5152    1.0719    2.7900 O   0  0  0  0  0  0  0  0  0  0  0  0
   -2.8938    1.3365    3.0623 C   0  0  0  0  0  0  0  0  0  0  0  0
   -3.1956    2.2901    2.6126 H   0  0  0  0  0  0  0  0  0  0  0  0
   -3.0705    1.3716    4.1448 H   0  0  0  0  0  0  0  0  0  0  0  0
   -0.9138   -0.3867    1.7282 Li  0  0  0  0  0  0  0  0  0  0  0  0
   -3.4730    0.5283    2.6145 H   0  0  0  0  0  0  0  0  0  0  0  0
   -3.6979   -2.7617    2.6961 H   0  0  0  0  0  0  0  0  0  0  0  0
   -4.0071   -3.9126    1.3785 H   0  0  0  0  0  0  0  0  0  0  0  0
    2.9974   -2.5523    1.6031 H   0  0  0  0  0  0  0  0  0  0  0  0
    1.5418   -2.4290    2.6132 H   0  0  0  0  0  0  0  0  0  0  0  0
   -0.6341    2.0832    3.2811 C   0  0  0  0  0  0  0  0  0  0  0  0
   -0.6810    2.1368    4.3761 H   0  0  0  0  0  0  0  0  0  0  0  0
    0.3737    1.8118    2.9637 H   0  0  0  0  0  0  0  0  0  0  0  0
   -0.9001    3.0604    2.8590 H   0  0  0  0  0  0  0  0  0  0  0  0
  1  5  1  0  0  0  0
  1  6  1  0  0  0  0
  1  8  1  0  0  0  0
  2  5  1  0  0  0  0
  2 32  1  0  0  0  0
  2 34  1  0  0  0  0
  3 22  1  0  0  0  0
  3 24  1  0  0  0  0
  3 28  1  0  0  0  0
  4 48  1  0  0  0  0
  4 50  1  0  0  0  0
  4 54  1  0  0  0  0
  6  7  1  0  0  0  0
  6 66  1  0  0  0  0
  6 67  1  0  0  0  0
  8  9  4  0  0  0  0
  8 23  1  0  0  0  0
  9 10  1  0  0  0  0
  9 11  4  0  0  0  0
 11 12  1  0  0  0  0
 11 13  2  0  0  0  0
 13 14  1  0  0  0  0
 13 15  4  0  0  0  0
 15 16  4  0  0  0  0
 15 23  4  0  0  0  0
 16 17  1  0  0  0  0
 16 18  2  0  0  0  0
 18 19  1  0  0  0  0
 18 20  4  0  0  0  0
 20 21  1  0  0  0  0
 20 22  4  0  0  0  0
 22 23  1  0  0  0  0
 24 25  1  0  0  0  0
 24 26  1  0  0  0  0
 24 27  1  0  0  0  0
 28 29  1  0  0  0  0
 28 30  1  0  0  0  0
 28 31  1  0  0  0  0
 32 33  1  0  0  0  0
 32 64  1  0  0  0  0
 32 65  1  0  0  0  0
 34 35  4  0  0  0  0
 34 49  1  0  0  0  0
 35 36  1  0  0  0  0
 35 37  4  0  0  0  0
 37 38  1  0  0  0  0
 37 39  2  0  0  0  0
 39 40  1  0  0  0  0
 39 41  4  0  0  0  0
 41 42  4  0  0  0  0
 41 49  4  0  0  0  0
 42 43  1  0  0  0  0
 42 44  2  0  0  0  0
 44 45  1  0  0  0  0
 44 46  4  0  0  0  0
 46 47  1  0  0  0  0
 46 48  4  0  0  0  0
 48 49  1  0  0  0  0
 50 51  1  0  0  0  0
 50 52  1  0  0  0  0
 50 53  1  0  0  0  0
 54 55  1  0  0  0  0
 54 56  1  0  0  0  0
 54 57  1  0  0  0  0
 58 59  1  0  0  0  0
 58 62  1  0  0  0  0
 58 68  1  0  0  0  0
 59 60  1  0  0  0  0
 59 61  1  0  0  0  0
 59 63  1  0  0  0  0
 68 69  1  0  0  0  0
 68 70  1  0  0  0  0
 68 71  1  0  0  0  0
