# Supplementary material for: Alkali metal complexes of a naphthylamine-substituted phosphanide
Source: Royal Society of Chemistry journal article supplement (doi:10.1039/b715145d), 2007-12-07
Supplement: b715145d-3.mdl [file b715145d-3.mdl]

NaphthylLiB_MP2

Created by GaussView 3.09
 71 73  0  0  0  0  0  0  0  0  0    0
    5.5804   -1.4767   -0.9006 C   0  0  0  0  0  0  0  0  0  0  0  0
    4.2359   -1.6886   -1.2706 C   0  0  0  0  0  0  0  0  0  0  0  0
    5.9531   -0.2563   -0.4119 C   0  0  0  0  0  0  0  0  0  0  0  0
    3.2495   -0.7308   -1.0933 C   0  0  0  0  0  0  0  0  0  0  0  0
    4.9864    0.7653   -0.2009 C   0  0  0  0  0  0  0  0  0  0  0  0
    3.5737    0.5363   -0.4423 C   0  0  0  0  0  0  0  0  0  0  0  0
    3.1932    2.7923    0.4178 C   0  0  0  0  0  0  0  0  0  0  0  0
    2.6527    1.5801   -0.0115 C   0  0  0  0  0  0  0  0  0  0  0  0
    4.5707    3.0423    0.5195 C   0  0  0  0  0  0  0  0  0  0  0  0
    5.4517    2.0219    0.2593 C   0  0  0  0  0  0  0  0  0  0  0  0
    0.8027    1.4515    0.1610 P   0  0  0  0  0  0  0  0  0  0  0  0
    1.9254   -1.0053   -1.6082 N   0  0  0  0  0  0  0  0  0  0  0  0
    1.5513   -0.0799   -2.7016 C   0  0  0  0  0  0  0  0  0  0  0  0
    1.6768   -2.3804   -2.0676 C   0  0  0  0  0  0  0  0  0  0  0  0
    0.2072    2.9016   -0.8768 C   0  0  0  0  0  0  0  0  0  0  0  0
   -0.9516    0.6934    1.7015 Li  0  0  0  0  0  0  0  0  0  0  0  0
   -3.8553   -2.4356   -0.2968 C   0  0  0  0  0  0  0  0  0  0  0  0
   -4.8483   -2.4162   -1.2881 C   0  0  0  0  0  0  0  0  0  0  0  0
   -3.2058   -1.2853    0.1644 C   0  0  0  0  0  0  0  0  0  0  0  0
   -5.1820   -1.2286   -1.8938 C   0  0  0  0  0  0  0  0  0  0  0  0
   -3.7190    0.0016   -0.2976 C   0  0  0  0  0  0  0  0  0  0  0  0
   -4.6284   -0.0115   -1.4235 C   0  0  0  0  0  0  0  0  0  0  0  0
   -4.5647    2.4047   -1.6141 C   0  0  0  0  0  0  0  0  0  0  0  0
   -5.0012    1.1946   -2.0777 C   0  0  0  0  0  0  0  0  0  0  0  0
   -3.8264    2.4573   -0.4135 C   0  0  0  0  0  0  0  0  0  0  0  0
   -3.4380    1.3119    0.2648 C   0  0  0  0  0  0  0  0  0  0  0  0
   -2.8504    1.4544    1.5914 N   0  0  0  0  0  0  0  0  0  0  0  0
   -1.6641   -1.4966    1.1393 P   0  0  0  0  0  0  0  0  0  0  0  0
   -2.5380    2.8355    2.0050 C   0  0  0  0  0  0  0  0  0  0  0  0
   -3.7262    0.8486    2.6256 C   0  0  0  0  0  0  0  0  0  0  0  0
   -1.8266   -3.2045    1.8941 C   0  0  0  0  0  0  0  0  0  0  0  0
    0.5720   -0.9745    0.0295 Li  0  0  0  0  0  0  0  0  0  0  0  0
    0.5641    2.8468   -1.9114 H   0  0  0  0  0  0  0  0  0  0  0  0
    0.4986    3.8768   -0.4722 H   0  0  0  0  0  0  0  0  0  0  0  0
   -0.8864    2.8603   -0.9105 H   0  0  0  0  0  0  0  0  0  0  0  0
   -1.7339   -4.0253    1.1738 H   0  0  0  0  0  0  0  0  0  0  0  0
   -2.7728   -3.3284    2.4315 H   0  0  0  0  0  0  0  0  0  0  0  0
   -1.0171   -3.3092    2.6227 H   0  0  0  0  0  0  0  0  0  0  0  0
    6.3101   -2.2654   -1.0588 H   0  0  0  0  0  0  0  0  0  0  0  0
    3.9945   -2.6251   -1.7550 H   0  0  0  0  0  0  0  0  0  0  0  0
    6.9917   -0.0400   -0.1773 H   0  0  0  0  0  0  0  0  0  0  0  0
    2.5051    3.5661    0.7443 H   0  0  0  0  0  0  0  0  0  0  0  0
    4.9243    4.0110    0.8617 H   0  0  0  0  0  0  0  0  0  0  0  0
    6.5206    2.1543    0.4028 H   0  0  0  0  0  0  0  0  0  0  0  0
    1.7647    0.9452   -2.4156 H   0  0  0  0  0  0  0  0  0  0  0  0
    2.1107   -0.3236   -3.6185 H   0  0  0  0  0  0  0  0  0  0  0  0
    0.4796   -0.1654   -2.8982 H   0  0  0  0  0  0  0  0  0  0  0  0
    0.6151   -2.4650   -2.3184 H   0  0  0  0  0  0  0  0  0  0  0  0
    1.9039   -3.1003   -1.2786 H   0  0  0  0  0  0  0  0  0  0  0  0
    2.2554   -2.6512   -2.9652 H   0  0  0  0  0  0  0  0  0  0  0  0
   -3.5283   -3.4032    0.0669 H   0  0  0  0  0  0  0  0  0  0  0  0
   -5.2996   -3.3500   -1.6138 H   0  0  0  0  0  0  0  0  0  0  0  0
   -5.8815   -1.1953   -2.7241 H   0  0  0  0  0  0  0  0  0  0  0  0
   -4.8329    3.3287   -2.1177 H   0  0  0  0  0  0  0  0  0  0  0  0
   -5.6436    1.1293   -2.9516 H   0  0  0  0  0  0  0  0  0  0  0  0
   -3.6111    3.4334   -0.0014 H   0  0  0  0  0  0  0  0  0  0  0  0
   -3.4342    3.4657    2.1089 H   0  0  0  0  0  0  0  0  0  0  0  0
   -2.0487    2.7945    2.9839 H   0  0  0  0  0  0  0  0  0  0  0  0
   -1.8469    3.3029    1.3015 H   0  0  0  0  0  0  0  0  0  0  0  0
   -4.6619    1.4194    2.7205 H   0  0  0  0  0  0  0  0  0  0  0  0
   -3.2052    0.8565    3.5879 H   0  0  0  0  0  0  0  0  0  0  0  0
   -3.9506   -0.1833    2.3686 H   0  0  0  0  0  0  0  0  0  0  0  0
    1.6913   -1.8299    1.5625 O   0  0  0  0  0  0  0  0  0  0  0  0
    1.9020   -3.2331    1.6419 C   0  0  0  0  0  0  0  0  0  0  0  0
    2.5446   -1.1033    2.4471 C   0  0  0  0  0  0  0  0  0  0  0  0
    1.1512   -3.7114    1.0102 H   0  0  0  0  0  0  0  0  0  0  0  0
    1.7739   -3.5891    2.6730 H   0  0  0  0  0  0  0  0  0  0  0  0
    2.9092   -3.4996    1.2939 H   0  0  0  0  0  0  0  0  0  0  0  0
    2.2953   -0.0469    2.3421 H   0  0  0  0  0  0  0  0  0  0  0  0
    3.5989   -1.2550    2.1854 H   0  0  0  0  0  0  0  0  0  0  0  0
    2.3750   -1.4228    3.4842 H   0  0  0  0  0  0  0  0  0  0  0  0
  1  2  4  0  0  0  0
  1  3  2  0  0  0  0
  1 39  1  0  0  0  0
  2  4  4  0  0  0  0
  2 40  1  0  0  0  0
  3  5  4  0  0  0  0
  3 41  1  0  0  0  0
  4  6  1  0  0  0  0
  4 12  1  0  0  0  0
  5  6  1  0  0  0  0
  5 10  4  0  0  0  0
  6  8  1  0  0  0  0
  7  8  4  0  0  0  0
  7  9  4  0  0  0  0
  7 42  1  0  0  0  0
  8 11  1  0  0  0  0
  9 10  2  0  0  0  0
  9 43  1  0  0  0  0
 10 44  1  0  0  0  0
 11 15  1  0  0  0  0
 11 16  1  0  0  0  0
 11 32  1  0  0  0  0
 12 13  1  0  0  0  0
 12 14  1  0  0  0  0
 13 45  1  0  0  0  0
 13 46  1  0  0  0  0
 13 47  1  0  0  0  0
 14 48  1  0  0  0  0
 14 49  1  0  0  0  0
 14 50  1  0  0  0  0
 15 33  1  0  0  0  0
 15 34  1  0  0  0  0
 15 35  1  0  0  0  0
 16 28  1  0  0  0  0
 17 18  4  0  0  0  0
 17 19  4  0  0  0  0
 17 51  1  0  0  0  0
 18 20  2  0  0  0  0
 18 52  1  0  0  0  0
 19 21  1  0  0  0  0
 19 28  1  0  0  0  0
 20 22  4  0  0  0  0
 20 53  1  0  0  0  0
 21 22  4  0  0  0  0
 21 26  1  0  0  0  0
 22 24  4  0  0  0  0
 23 24  2  0  0  0  0
 23 25  4  0  0  0  0
 23 54  1  0  0  0  0
 24 55  1  0  0  0  0
 25 26  4  0  0  0  0
 25 56  1  0  0  0  0
 26 27  1  0  0  0  0
 27 29  1  0  0  0  0
 27 30  1  0  0  0  0
 28 31  1  0  0  0  0
 29 57  1  0  0  0  0
 29 58  1  0  0  0  0
 29 59  1  0  0  0  0
 30 60  1  0  0  0  0
 30 61  1  0  0  0  0
 30 62  1  0  0  0  0
 31 36  1  0  0  0  0
 31 37  1  0  0  0  0
 31 38  1  0  0  0  0
 63 64  1  0  0  0  0
 63 65  1  0  0  0  0
 64 66  1  0  0  0  0
 64 67  1  0  0  0  0
 64 68  1  0  0  0  0
 65 69  1  0  0  0  0
 65 70  1  0  0  0  0
 65 71  1  0  0  0  0
