# Supplementary material for: Alkali metal complexes of a naphthylamine-substituted phosphanide
Source: Royal Society of Chemistry journal article supplement (doi:10.1039/b715145d), 2007-12-07
Supplement: b715145d.pdf [file b715145d.pdf]

Electronic Supplementary Information for Dalton Transactions  
This journal is © The Royal Society of Chemistry 2007

**Alkali Metal Complexes of a Naphthylamine-Substituted Phosphanide.**

Keith Izod,\* John C. Stewart, William Clegg and Ross W. Harrington

*Main Group Chemistry Laboratories, Department of Chemistry, School of Natural  
Sciences, Bedson Building, University of Newcastle, Newcastle upon Tyne, NE1 7RU,  
UK; e-mail: k.j.izod@ncl.ac.uk*

**SUPPORTING INFORMATION**

Atomic coordinates (Å) for **2a-hh<sub>anti</sub>**:

|    | x         | y         | z         |
|----|-----------|-----------|-----------|
| P  | -0.927100 | -0.301500 | 1.872200  |
| P  | 0.928700  | -0.303600 | -1.874300 |
| N  | -1.996600 | -2.240000 | -0.267900 |
| N  | 1.996400  | -2.241000 | 0.267000  |
| Li | -0.000100 | -1.510000 | -0.000700 |
| C  | -0.475400 | 0.743000  | 3.362300  |
| H  | -0.576700 | 1.823200  | 3.203500  |
| C  | -2.607800 | 0.266400  | 1.415700  |
| C  | -3.255700 | 1.200000  | 2.239800  |
| H  | -2.815600 | 1.447500  | 3.198300  |
| C  | -4.433300 | 1.869800  | 1.870400  |
| H  | -4.879500 | 2.584100  | 2.558000  |
| C  | -4.985700 | 1.654500  | 0.630900  |
| H  | -5.858400 | 2.207700  | 0.296400  |
| C  | -4.426800 | 0.677800  | -0.233800 |
| C  | -5.014200 | 0.499900  | -1.515900 |
| H  | -5.846100 | 1.141100  | -1.794200 |
| C  | -4.540300 | -0.451200 | -2.377700 |
| H  | -4.974900 | -0.578400 | -3.364900 |
| C  | -3.519100 | -1.323900 | -1.951900 |
| H  | -3.237400 | -2.128900 | -2.616200 |
| C  | -2.921000 | -1.204600 | -0.705900 |
| C  | -3.286200 | -0.111900 | 0.175300  |
| C  | -1.585700 | -3.194000 | -1.314700 |
| H  | -2.420300 | -3.806100 | -1.689100 |
| H  | -0.852100 | -3.881000 | -0.880000 |
| H  | -1.112200 | -2.669100 | -2.147000 |
| C  | -2.574000 | -3.014200 | 0.859500  |
| H  | -3.443100 | -3.597500 | 0.519700  |
| H  | -2.871100 | -2.346700 | 1.664100  |
| H  | -1.815800 | -3.698200 | 1.250900  |
| C  | 0.476900  | 0.742700  | -3.363100 |
| H  | -0.576100 | 0.530400  | -3.574700 |
| C  | 2.608300  | 0.266000  | -1.415400 |
| C  | 3.256000  | 1.200700  | -2.238400 |
| H  | 2.816600  | 1.448400  | -3.197200 |
| C  | 4.432700  | 1.871200  | -1.867500 |
| H  | 4.878900  | 2.586300  | -2.554300 |
| C  | 4.984500  | 1.655500  | -0.627800 |
| H  | 5.856500  | 2.209000  | -0.292300 |
| C  | 4.425600  | 0.677700  | 0.235700  |
| C  | 5.012400  | 0.499400  | 1.518200  |
| H  | 5.843700  | 1.140900  | 1.797300  |

|    |           |           |           |
|----|-----------|-----------|-----------|
| C  | 4.538500  | -0.452500 | 2.379100  |
| H  | 4.972500  | -0.580100 | 3.366400  |
| C  | 3.517900  | -1.325400 | 1.952200  |
| H  | 3.236100  | -2.130900 | 2.615800  |
| C  | 2.920500  | -1.205700 | 0.705800  |
| C  | 3.285900  | -0.112400 | -0.174600 |
| C  | 2.574600  | -3.015200 | -0.860000 |
| H  | 3.443300  | -3.598700 | -0.519500 |
| H  | 2.872600  | -2.347600 | -1.664200 |
| H  | 1.816600  | -3.698900 | -1.252200 |
| C  | 1.584500  | -3.195100 | 1.313300  |
| H  | 2.418600  | -3.807400 | 1.688300  |
| H  | 0.851000  | -3.881800 | 0.878000  |
| H  | 1.110500  | -2.670100 | 2.145400  |
| H  | 0.577200  | 1.822700  | -3.202800 |
| H  | 1.050700  | 0.476700  | -4.257800 |
| H  | 0.577800  | 0.531300  | 3.573200  |
| H  | -1.048600 | 0.475300  | 4.256900  |
| O  | 0.002000  | 3.071100  | -0.000700 |
| C  | 1.020600  | 3.859900  | -0.618100 |
| H  | 1.513200  | 4.498100  | 0.126500  |
| H  | 0.590600  | 4.490500  | -1.406700 |
| Li | 0.003200  | 1.159900  | -0.000800 |
| H  | 1.749700  | 3.174200  | -1.052200 |
| C  | -1.020300 | 3.856300  | 0.615200  |
| H  | -1.515800 | 4.490900  | -0.130600 |
| H  | -1.746300 | 3.168100  | 1.050500  |
| H  | -0.593300 | 4.490400  | 1.402700  |

Final energy: -1966.09426 a.u.

NIMAG = 0

Atomic coordinates (Å) for **2a-hh<sub>syn</sub>**:

|    | x        | y        | z        |
|----|----------|----------|----------|
| P  | 1.31640  | -0.90840 | 0.72290  |
| P  | -2.43730 | -2.11920 | 0.61120  |
| N  | 4.14660  | -1.79560 | -0.45380 |
| N  | -1.53940 | -0.76420 | -2.04930 |
| Li | -0.46510 | -1.82530 | -0.62270 |
| C  | 2.27050  | -1.85850 | 2.02540  |
| H  | 2.78980  | -1.17820 | 2.70790  |
| C  | 2.35320  | 0.53700  | 0.21420  |
| C  | 1.63230  | 1.72600  | 0.06450  |
| H  | 0.55140  | 1.69080  | 0.18320  |
| C  | 2.23890  | 2.97900  | -0.13560 |
| H  | 1.62010  | 3.86570  | -0.24630 |
| C  | 3.60940  | 3.08150  | -0.08400 |

|    |          |          |          |
|----|----------|----------|----------|
| H  | 4.10220  | 4.04890  | -0.12820 |
| C  | 4.40830  | 1.91550  | 0.02560  |
| C  | 5.82150  | 2.04660  | 0.11700  |
| H  | 6.24850  | 3.04510  | 0.15480  |
| C  | 6.62230  | 0.93480  | 0.15710  |
| H  | 7.70110  | 1.03170  | 0.24300  |
| C  | 6.05190  | -0.34480 | -0.00640 |
| H  | 6.71440  | -1.19580 | -0.11100 |
| C  | 4.68020  | -0.52390 | -0.11970 |
| C  | 3.79150  | 0.60860  | 0.04120  |
| C  | 4.98200  | -2.95770 | -0.19890 |
| H  | 5.82560  | -3.06520 | -0.90520 |
| H  | 4.36510  | -3.85830 | -0.28800 |
| H  | 5.38510  | -2.91710 | 0.81590  |
| C  | 3.53930  | -1.86560 | -1.78250 |
| H  | 2.91600  | -2.76360 | -1.85010 |
| H  | 4.30360  | -1.90690 | -2.57990 |
| H  | 2.90510  | -0.99690 | -1.95190 |
| C  | -3.24630 | -3.27250 | 1.83840  |
| H  | -2.45320 | -3.92640 | 2.21480  |
| C  | -3.76720 | -0.98310 | 0.07860  |
| C  | -5.03720 | -1.10470 | 0.65800  |
| H  | -5.25610 | -1.97210 | 1.26890  |
| C  | -6.03340 | -0.12130 | 0.54080  |
| H  | -6.99510 | -0.27550 | 1.02360  |
| C  | -5.76800 | 1.04800  | -0.12970 |
| H  | -6.49530 | 1.85340  | -0.17140 |
| C  | -4.52890 | 1.21390  | -0.80190 |
| C  | -4.27860 | 2.44630  | -1.46410 |
| H  | -5.03240 | 3.22660  | -1.40360 |
| C  | -3.11440 | 2.64540  | -2.15560 |
| H  | -2.90910 | 3.59260  | -2.64560 |
| C  | -2.20390 | 1.57900  | -2.29950 |
| H  | -1.35080 | 1.73160  | -2.94590 |
| C  | -2.40970 | 0.34940  | -1.69120 |
| C  | -3.54200 | 0.15730  | -0.80680 |
| C  | -2.29740 | -1.78130 | -2.82350 |
| H  | -2.61620 | -1.37270 | -3.79370 |
| H  | -3.16630 | -2.10980 | -2.25760 |
| H  | -1.65710 | -2.65160 | -3.00150 |
| C  | -0.33470 | -0.39180 | -2.81790 |
| H  | -0.56990 | -0.00330 | -3.82000 |
| H  | 0.28040  | -1.28790 | -2.95260 |
| H  | 0.25560  | 0.34650  | -2.27150 |
| O  | -1.51520 | 1.07190  | 2.79000  |
| C  | -2.89380 | 1.33650  | 3.06230  |
| H  | -3.19560 | 2.29010  | 2.61260  |
| H  | -3.07050 | 1.37160  | 4.14480  |
| Li | -0.91380 | -0.38670 | 1.72820  |
| H  | -3.47300 | 0.52830  | 2.61450  |

|   |          |          |         |
|---|----------|----------|---------|
| H | -3.69790 | -2.76170 | 2.69610 |
| H | -4.00710 | -3.91260 | 1.37850 |
| H | 2.99740  | -2.55230 | 1.60310 |
| H | 1.54180  | -2.42900 | 2.61320 |
| C | -0.63410 | 2.08320  | 3.28110 |
| H | -0.68100 | 2.13680  | 4.37610 |
| H | 0.37370  | 1.81180  | 2.96370 |
| H | -0.90010 | 3.06040  | 2.85900 |

Final Energy: -1966.06744 a.u.  
NIMAG = 0

Atomic coordinates (Å) for **2a-ht**:

|    | x         | y         | z         |
|----|-----------|-----------|-----------|
| C  | 5.580400  | -1.476700 | -0.900600 |
| C  | 4.235900  | -1.688600 | -1.270600 |
| C  | 5.953100  | -0.256300 | -0.411900 |
| C  | 3.249500  | -0.730800 | -1.093300 |
| C  | 4.986400  | 0.765300  | -0.200900 |
| C  | 3.573700  | 0.536300  | -0.442300 |
| C  | 3.193200  | 2.792300  | 0.417800  |
| C  | 2.652700  | 1.580100  | -0.011500 |
| C  | 4.570700  | 3.042300  | 0.519500  |
| C  | 5.451700  | 2.021900  | 0.259300  |
| P  | 0.802700  | 1.451500  | 0.161000  |
| N  | 1.925400  | -1.005300 | -1.608200 |
| C  | 1.551300  | -0.079900 | -2.701600 |
| C  | 1.676800  | -2.380400 | -2.067600 |
| C  | 0.207200  | 2.901600  | -0.876800 |
| Li | -0.951600 | 0.693400  | 1.701500  |
| C  | -3.855300 | -2.435600 | -0.296800 |
| C  | -4.848300 | -2.416200 | -1.288100 |
| C  | -3.205800 | -1.285300 | 0.164400  |
| C  | -5.182000 | -1.228600 | -1.893800 |
| C  | -3.719000 | 0.001600  | -0.297600 |
| C  | -4.628400 | -0.011500 | -1.423500 |
| C  | -4.564700 | 2.404700  | -1.614100 |
| C  | -5.001200 | 1.194600  | -2.077700 |
| C  | -3.826400 | 2.457300  | -0.413500 |
| C  | -3.438000 | 1.311900  | 0.264800  |
| N  | -2.850400 | 1.454400  | 1.591400  |
| P  | -1.664100 | -1.496600 | 1.139300  |
| C  | -2.538000 | 2.835500  | 2.005000  |
| C  | -3.726200 | 0.848600  | 2.625600  |
| C  | -1.826600 | -3.204500 | 1.894100  |
| Li | 0.572000  | -0.974500 | 0.029500  |
| H  | 0.564100  | 2.846800  | -1.911400 |

|   |           |           |           |
|---|-----------|-----------|-----------|
| H | 0.498600  | 3.876800  | -0.472200 |
| H | -0.886400 | 2.860300  | -0.910500 |
| H | -1.733900 | -4.025300 | 1.173800  |
| H | -2.772800 | -3.328400 | 2.431500  |
| H | -1.017100 | -3.309200 | 2.622700  |
| H | 6.310100  | -2.265400 | -1.058800 |
| H | 3.994500  | -2.625100 | -1.755000 |
| H | 6.991700  | -0.040000 | -0.177300 |
| H | 2.505100  | 3.566100  | 0.744300  |
| H | 4.924300  | 4.011000  | 0.861700  |
| H | 6.520600  | 2.154300  | 0.402800  |
| H | 1.764700  | 0.945200  | -2.415600 |
| H | 2.110700  | -0.323600 | -3.618500 |
| H | 0.479600  | -0.165400 | -2.898200 |
| H | 0.615100  | -2.465000 | -2.318400 |
| H | 1.903900  | -3.100300 | -1.278600 |
| H | 2.255400  | -2.651200 | -2.965200 |
| H | -3.528300 | -3.403200 | 0.066900  |
| H | -5.299600 | -3.350000 | -1.613800 |
| H | -5.881500 | -1.195300 | -2.724100 |
| H | -4.832900 | 3.328700  | -2.117700 |
| H | -5.643600 | 1.129300  | -2.951600 |
| H | -3.611100 | 3.433400  | -0.001400 |
| H | -3.434200 | 3.465700  | 2.108900  |
| H | -2.048700 | 2.794500  | 2.983900  |
| H | -1.846900 | 3.302900  | 1.301500  |
| H | -4.661900 | 1.419400  | 2.720500  |
| H | -3.205200 | 0.856500  | 3.587900  |
| H | -3.950600 | -0.183300 | 2.368600  |
| O | 1.691300  | -1.829900 | 1.562500  |
| C | 1.902000  | -3.233100 | 1.641900  |
| C | 2.544600  | -1.103300 | 2.447100  |
| H | 1.151200  | -3.711400 | 1.010200  |
| H | 1.773900  | -3.589100 | 2.673000  |
| H | 2.909200  | -3.499600 | 1.293900  |
| H | 2.295300  | -0.046900 | 2.342100  |
| H | 3.598900  | -1.255000 | 2.185400  |
| H | 2.375000  | -1.422800 | 3.484200  |

Final Energy: -1966.07035 a.u.  
NIMAG = 0
